# Supplementary material for: Identification and validation of single nucleotide polymorphic markers linked to Ug99 stem rust resistance in spring wheat
Source: PLoS One. 2017 Feb 27;12(2):e0171963. doi: 10.1371/journal.pone.0171963 (PMC5328255; doi:10.1371/journal.pone.0171963)
Supplement: S1 Table — (XLSX) [file pone.0171963.s001.xlsx]

## Sheet: Genotyping-5021.001-01 Grid.csv
Line	wSrsnp6149	wSrsnp1073	wSrsnp4368	wSrsnp7785	Cross Name (Pedigree)	Stem rust response
H2_11	G:G	A:A	T:T	C:C	WHEAR/KUKUNA//WHEAR	Sr25
H2_12	G:G	A:A	T:T	C:C	WHEAR/KIRITATI/3/C80.1/3*BATAVIA//2*WBLL1	Sr25
H2_42	G:G	A:A	T:T	C:C	WHEAR//INQALAB 91*2/TUKURU	Sr25
H2_69	G:G	A:A	T:T	C:C	WHEAR/SOKOLL	Sr25
H2_70	G:G	A:A	T:T	C:C	WHEAR//2*PRL/2*PASTOR	Sr25
M5_2	G:G	A:A	T:T	C:C	CHEWINK	Sr25
M5_3	G:G	A:A	T:T	C:C	WHEAR/4/2*SERI.1B*2/3/KAUZ*2/BOW//KAUZ	Sr25
M5_4	G:G	A:A	T:T	C:C	WHEAR//2*PRL/2*PASTOR	Sr25
M5_5	G:G	A:A	T:T	C:C	WHEAR//2*PRL/2*PASTOR	Sr25
M5_6	G:G	A:A	T:T	C:C	WHEAR//2*PRL/2*PASTOR	Sr25
M5_25	G:G	A:A	T:T	C:C	WBLL1*2/TUKURU//WHEAR	Sr25
M5_26	G:G	A:A	T:T	C:C	INQALAB 91*2/TUKURU//WHEAR	Sr25
M5_98	G:G	A:A	T:T	C:C	WBLL1*2/KUKUNA*2//WHEAR	Sr25
M5_106	G:G	A:A	T:T	C:C	WAXWING/WHEAR//WAXWING/KIRITATI	Sr25
M5_162	G:G	A:A	T:T	C:C	ATTILA*2/PBW65*2//WHEAR	Sr25
M5_163	G:G	A:A	T:T	C:C	ATTILA*2/PBW65*2//WHEAR	Sr25
M5_165	G:G	A:A	T:T	C:C	FRET2/KUKUNA//FRET2/3/WHEAR/4/FRET2*2/KUKUNA	Sr25
M5_171	G:G	A:A	T:T	C:C	PBW343*2/TUKURU//WHEAR/3/PBW343*2/TUKURU	Sr25?
M5_107	G:G	A:A	T:T	C:C	WAXWING/SRTU//WAXWING/KIRITATI	APR-R
M5_81	G:G	?	T:T	C:C	FRET2*2/KUKUNA/6/PVN//CAR422/ANA/5/BOW/CROW//BUC/PVN/3/YR/4/TRAP#1/7/FRET2/KURUKU//FRET2	APR-R
H2_28	A:A	G:G	T:T	C:C	SHARP/3/PRL/SARA//TSI/VEE#5/5/VEE/LIRA//BOW/3/BCN/4/KAUZ	Sr-Sharp
H2_73	A:A	G:G	C:C	C:C	CANADIAN/CUNNINGHAM//KENNEDY	S
H2_30	A:A	G:G	C:C	A:A	YAR/AE.SQUARROSA (783)/4/GOV/AZ//MUS/3/SARA/5/MYNA/VUL//JUN	-
H2_76	A:A	G:G	C:C	A:A	PANDORA	-
M5_57	A:A	G:G	C:C	A:A	ATTILA/3*BCN//BAV92/3/TILHI/5/BAV92/3/PRL/SARA//TSI/VEE#5/4/CROC_1/AE.SQUARROSA (224)//2*OPATA	APR-MR
M5_131	A:A	G:G	?	A:A	PBW343*2/KUKUNA//PARUS/3/PBW343*2/KUKUNA	APR-MR
M5_10	A:A	G:G	C:C	A:A	MARCHOUCH*4/SAADA/3/2*FRET2/KUKUNA//FRET2	APR-R
M5_11	A:A	G:G	C:C	A:A	MARCHOUCH*4/SAADA/3/2*FRET2/KUKUNA//FRET2	APR-R
M5_12	A:A	G:G	C:C	A:A	MARCHOUCH*4/SAADA/3/2*FRET2/KUKUNA//FRET2	APR-R
M5_22	A:A	G:G	C:C	A:A	ATTILA*2/PBW65//KIRITATI	APR-R
M5_33	A:A	G:G	C:C	A:A	PBW343*2/KUKUNA/5/KAUZ//ALTAR 84/AOS/3/PASTOR/4/TILHI/6/PBW343	APR-R
M5_36	A:A	G:G	C:C	A:A	WBLL1*2/CHAPIO//MESIA	APR-R
M5_37	A:A	G:G	C:C	A:A	WBLL1*2/CHAPIO//MESIA	APR-R
M5_41	A:A	?	?	A:A	WAXWING/KIRITATI//DIAMONDBIRD	APR-R
M5_45	A:A	G:G	C:C	A:A	TACUPETO F2001/BRAMBLING//KIRITATI	APR-R
M5_46	A:A	G:G	C:C	A:A	TACUPETO F2001/BRAMBLING//KIRITATI	APR-R
M5_47	A:A	G:G	C:C	A:A	TACUPETO F2001/BRAMBLING//KIRITATI	APR-R
M5_48	A:A	G:G	C:C	A:A	TACUPETO F2001/BRAMBLING//KIRITATI	APR-R
M5_49	A:A	G:G	C:C	A:A	PFAU/WEAVER*2//BRAMBLING/3/DIAMONDBIRD	APR-R
M5_50	A:A	G:G	C:C	A:A	PFAU/WEAVER*2//BRAMBLING/3/DIAMONDBIRD	APR-R
M5_52	A:A	G:G	C:C	A:A	PFAU/WEAVER*2//BRAMBLING/3/DIAMONDBIRD	APR-R
M5_53	A:A	G:G	C:C	A:A	PFAU/WEAVER*2//BRAMBLING/9/RABE/6/WRM/4/FN/3*TH//K58/2*N/3/AUS-6869/5/PELOTAS-ARTHUR/7/2*RABE/8/IRENA	APR-R
M5_66	A:A	G:G	C:C	A:A	ROLF07*2/KIRITATI	APR-R
M5_68	A:A	G:G	C:C	A:A	FRET2*2/4/SNI/TRAP#1/3/KAUZ*2/TRAP//KAUZ*2/6/PVN//CAR422/ANA/5/BOW/CROW//BUC/PVN/3/YR/4/TRAP#1	APR-R
M5_69	A:A	G:G	C:C	A:A	FRET2*2/4/SNI/TRAP#1/3/KAUZ*2/TRAP//KAUZ*2/6/PVN//CAR422/ANA/5/BOW/CROW//BUC/PVN/3/YR/4/TRAP#1	APR-R
M5_72	A:A	G:G	C:C	A:A	FRET2*2/4/SNI/TRAP#1/3/KAUZ*2/TRAP//KAUZ*2/5/TUKURU	APR-R
M5_83	A:A	G:G	C:C	A:A	FRET2/KUKUNA//FRET2/3/TNMU/5/FRET2*2/4/SNI/TRAP#1/3/KAUZ*2/TRAP//KAUZ	APR-R
M5_85	A:A	G:G	C:C	A:A	FRET2/KUKUNA//FRET2/3/PARUS/5/FRET2*2/4/SNI/TRAP#1/3/KAUZ*2/TRAP//KAUZ	APR-R
M5_99	A:A	G:G	C:C	A:A	TRCH/SRTU/5/KAUZ//ALTAR 84/AOS/3/MILAN/KAUZ/4/HUITES	APR-R
M5_102	A:A	G:G	C:C	A:A	SERI.1B//KAUZ/HEVO/3/AMAD*2/4/KIRITATI	APR-R
M5_126	A:A	G:G	C:C	A:A	PBW343*2/KUKUNA/6/PVN//CAR422/ANA/5/BOW/CROW//BUC/PVN/3/YR/4/TRAP#1/7/PBW343	APR-R
M5_130	A:A	G:G	C:C	A:A	PBW343*2/KUKUNA//PARUS/3/PBW343*2/KUKUNA	APR-R
M5_137	A:A	G:G	C:C	A:A	PBW343*2/KUKUNA*2//YANAC	APR-R
M5_138	A:A	G:G	C:C	A:A	PBW343*2/KUKUNA*2//YANAC	APR-R
M5_142	A:A	G:G	C:C	A:A	PBW343*2/KUKUNA*2//YANAC	APR-R
M5_143	A:A	G:G	C:C	A:A	PBW343*2/KUKUNA*2//YANAC	APR-R
M5_147	A:A	G:G	C:C	A:A	PBW343*2/KUKUNA//SRTU/3/PBW343*2/KHVAKI	APR-R
M5_148	A:A	G:G	C:C	A:A	PBW343*2/KUKUNA//SRTU/3/PBW343*2/KHVAKI	APR-R
M5_149	A:A	G:G	C:C	A:A	PBW343*2/KUKUNA//SRTU/3/PBW343*2/KHVAKI	APR-R
M5_154	A:A	G:G	C:C	A:A	INQALAB 91*2/TUKURU//PVN/3/INQALAB 91*2/KHVAKI	APR-R
M5_164	A:A	G:G	C:C	A:A	ATTILA*2/PBW65//KIRITATI/3/WAXWING/KIRITATI	APR-R
M5_172	A:A	G:G	C:C	A:A	KINGBIRD	APR-R
M5_173	A:A	G:G	C:C	A:A	PBW343*2/KUKUNA//JUCHI	APR-R
M5_182	A:A	G:G	C:C	A:A	FRET2*2/KUKUNA//PVN/5/FRET2*2/4/SNI/TRAP#1/3/KAUZ*2/TRAP//KAUZ	APR-R
M5_7	A:A	G:G	C:C	A:A	CHEN/AEGILOPS SQUARROSA (TAUS)//BCN/3/BAV92/4/INQALAB 91*2/KUKUNA	APR-RMR
M5_9	A:A	G:G	C:C	A:A	KANZ*4/KS85-8-4/5/2*FRET2*2/4/SNI/TRAP#1/3/KAUZ*2/TRAP//KAUZ	APR-RMR
M5_13	A:A	G:G	C:C	A:A	FRET2*2/4/SNI/TRAP#1/3/KAUZ*2/TRAP//KAUZ/6/PVN//CAR422/ANA/5/BOW/CROW//BUC/PVN/3/YR/4/TRAP#1	APR-RMR
M5_14	A:A	G:G	C:C	A:A	FRET2/KUKUNA//FRET2/3/WHEAR	APR-RMR
M5_15	A:A	G:G	C:C	A:A	FRET2/KUKUNA//FRET2/3/WHEAR	APR-RMR
M5_17	A:A	G:G	C:C	A:A	WAXWING/6/PVN//CAR422/ANA/5/BOW/CROW//BUC/PVN/3/YR/4/TRAP#1	APR-RMR
M5_18	A:A	G:G	C:C	A:A	WAXWING/6/PVN//CAR422/ANA/5/BOW/CROW//BUC/PVN/3/YR/4/TRAP#1	APR-RMR
M5_19	A:A	?	?	A:A	WAXWING/7/TNMU/6/CEP80111/CEP81165/5/IAC5/4/YKT406/3/AG/ASN//ATR	APR-RMR
M5_21	A:A	G:G	C:C	A:A	PBW343*2/KUKUNA//JUCHI	APR-RMR
M5_23	A:A	G:G	C:C	A:A	ATTILA*2/PBW65//JUCHI	APR-RMR
M5_24	A:A	G:G	C:C	A:A	FRET2/KUKUNA//FRET2/3/WHEAR	APR-RMR
M5_30	A:A	G:G	C:C	A:A	WAXWING*2/4/CROC_1/AE.SQUARROSA (205)//BORL95/3/2*MILAN	APR-RMR
M5_31	A:A	G:G	C:C	A:A	BABAX/LR43//BABAX/6/MOR/VEE#5//DUCULA/3/DUCULA/4/MILAN/5/BAU/MILAN/7/SKAUZ/BAV92	APR-RMR
M5_32	A:A	G:G	C:C	A:A	BABAX/LR43//BABAX/4/CHEN/AEGILOPS SQUARROSA (TAUS)//BCN/3/BAV92/5/FRET2*2/4/SNI/TRAP#1/3/KAUZ*2/TRAP//KAUZ	APR-RMR
M5_34	A:A	G:G	C:C	A:A	PBW343*2/KUKUNA/4/BAV92//ATTILA/3*BCN/3/PASTOR/5/PBW343	APR-RMR
M5_35	A:A	G:G	C:C	A:A	ATTILA*2//CHIL/BUC*2/3/KUKUNA	APR-RMR
M5_38	A:A	G:G	C:C	A:A	TRCH/3/PRINIA/PASTOR//HUITES	APR-RMR
M5_39	A:A	G:G	C:C	A:A	TRCH/3/PRINIA/PASTOR//HUITES	APR-RMR
M5_40	A:A	G:G	C:C	A:A	TIMBA/5/KAUZ//ALTAR 84/AOS/3/MILAN/KAUZ/4/HUITES	APR-RMR
M5_43	A:A	G:G	C:C	A:A	TACUPETO F2001/BRAMBLING//PVN	APR-RMR
M5_44	A:A	G:G	C:C	A:A	TACUPETO F2001/BRAMBLING//PVN	APR-RMR
M5_51	A:A	G:G	C:C	A:A	PFAU/WEAVER*2//BRAMBLING/3/DIAMONDBIRD	APR-RMR
M5_54	A:A	G:G	C:C	A:A	ROLF07/7/CAL/NH//H567.71/3/SERI/4/CAL/NH//H567.71/5/2*KAUZ/6/PASTOR	APR-RMR
M5_58	A:A	G:G	C:C	A:A	WBLL1*2/VIVITSI/4/D67.2/P66.270//AE.SQUARROSA (320)/3/CUNNINGHAM	APR-RMR
M5_59	A:A	G:G	C:C	A:A	TRCH/5/REH/HARE//2*BCN/3/CROC_1/AE.SQUARROSA (213)//PGO/4/HUITES	APR-RMR
M5_60	A:A	G:G	C:C	A:A	ROLF07*2/6/PVN//CAR422/ANA/5/BOW/CROW//BUC/PVN/3/YR/4/TRAP#1	APR-RMR
M5_61	A:A	G:G	C:C	A:A	ROLF07/TUKURU/5/WBLL1*2/4/YACO/PBW65/3/KAUZ*2/TRAP//KAUZ	APR-RMR
M5_62	A:A	G:G	C:C	A:A	ROLF07*2/KITE	APR-RMR
M5_64	A:A	G:G	C:C	A:A	ROLF07/YANAC//TACUPETO F2001/BRAMBLING	APR-RMR
M5_65	A:A	G:G	C:C	A:A	ROLF07*2/KIRITATI	APR-RMR
M5_67	A:A	G:G	C:C	A:A	ROLF07/JUCHI/6/WBLL1/4/HD2281/TRAP#1/3/KAUZ*2/TRAP//KAUZ/5/TACUPETO F2001	APR-RMR
M5_70	A:A	G:G	C:C	A:A	FRET2*2/4/SNI/TRAP#1/3/KAUZ*2/TRAP//KAUZ*2/6/PVN//CAR422/ANA/5/BOW/CROW//BUC/PVN/3/YR/4/TRAP#1	APR-RMR
M5_71	A:A	G:G	C:C	A:A	FRET2*2/4/SNI/TRAP#1/3/KAUZ*2/TRAP//KAUZ*2/6/PVN//CAR422/ANA/5/BOW/CROW//BUC/PVN/3/YR/4/TRAP#1	APR-RMR
M5_73	A:A	G:G	C:C	A:A	FRET2*2/4/SNI/TRAP#1/3/KAUZ*2/TRAP//KAUZ*2/5/KITE	APR-RMR
M5_74	A:A	G:G	C:C	A:A	FRET2*2/4/SNI/TRAP#1/3/KAUZ*2/TRAP//KAUZ/5/PARUS/6/FRET2*2/KUKUNA	APR-RMR
M5_75	A:A	G:G	C:C	A:A	FRET2*2/4/SNI/TRAP#1/3/KAUZ*2/TRAP//KAUZ/5/PARUS/6/FRET2*2/KUKUNA	APR-RMR
M5_76	A:A	G:G	C:C	A:A	FRET2*2/4/SNI/TRAP#1/3/KAUZ*2/TRAP//KAUZ*2/5/KIRITATI	APR-RMR
M5_77	A:A	G:G	C:C	A:A	FRET2*2/4/SNI/TRAP#1/3/KAUZ*2/TRAP//KAUZ*2/5/KIRITATI	APR-RMR
M5_78	A:A	G:G	C:C	A:A	FRET2*2/4/SNI/TRAP#1/3/KAUZ*2/TRAP//KAUZ*2/5/KIRITATI	APR-RMR
M5_79	A:A	G:G	C:C	A:A	FRET2*2/4/SNI/TRAP#1/3/KAUZ*2/TRAP//KAUZ*2/5/KIRITATI	APR-RMR
M5_80	A:A	G:G	C:C	A:A	FRET2*2/KUKUNA/6/PVN//CAR422/ANA/5/BOW/CROW//BUC/PVN/3/YR/4/TRAP#1/7/FRET2/KURUKU//FRET2	APR-RMR
M5_82	A:A	G:G	C:C	A:A	FRET2/KUKUNA//FRET2/3/TUKURU/4/FRET2/TUKURU//FRET2	APR-RMR
M5_84	A:A	G:G	C:C	A:A	FRET2/KUKUNA//FRET2/3/TNMU/5/FRET2*2/4/SNI/TRAP#1/3/KAUZ*2/TRAP//KAUZ	APR-RMR
M5_86	A:A	G:G	C:C	A:A	FRET2/KUKUNA//FRET2/3/PARUS/5/FRET2*2/4/SNI/TRAP#1/3/KAUZ*2/TRAP//KAUZ	APR-RMR
M5_87	A:A	G:G	C:C	A:A	FRET2/KUKUNA//FRET2/3/PARUS/5/FRET2*2/4/SNI/TRAP#1/3/KAUZ*2/TRAP//KAUZ	APR-RMR
M5_88	A:A	G:G	C:C	A:A	FRET2/KUKUNA//FRET2/3/PARUS/5/FRET2*2/4/SNI/TRAP#1/3/KAUZ*2/TRAP//KAUZ	APR-RMR
M5_90	A:A	G:G	C:C	A:A	FRET2*2/KUKUNA*2/4/BOW/URES//2*WEAVER/3/CROC_1/AE.SQUARROSA (213)//PGO	APR-RMR
M5_92	A:A	G:G	C:C	A:A	FRET2/KUKUNA//FRET2/3/PASTOR//HXL7573/2*BAU/5/FRET2*2/4/SNI/TRAP#1/3/KAUZ*2/TRAP//KAUZ	APR-RMR
M5_93	A:A	G:G	C:C	A:A	FRET2/KUKUNA//FRET2/3/PASTOR//HXL7573/2*BAU/5/FRET2*2/4/SNI/TRAP#1/3/KAUZ*2/TRAP//KAUZ	APR-RMR
M5_94	A:A	G:G	C:C	A:A	FRET2/KUKUNA//FRET2/3/PASTOR//HXL7573/2*BAU/5/FRET2*2/4/SNI/TRAP#1/3/KAUZ*2/TRAP//KAUZ	APR-RMR
M5_95	A:A	G:G	C:C	A:A	FRET2/KUKUNA//FRET2/3/PASTOR//HXL7573/2*BAU/5/FRET2*2/4/SNI/TRAP#1/3/KAUZ*2/TRAP//KAUZ	APR-RMR
M5_96	A:A	G:G	C:C	A:A	FRET2/KUKUNA//FRET2/7/TNMU/6/CEP80111/CEP81165/5/IAC5/4/YKT406/3/AG/ASN//ATR/8/FRET2/KURUKU//FRET2	APR-RMR
M5_97	A:A	G:G	C:C	A:A	WBLL1*2/KURUKU//PARUS/3/WBLL1*2/KURUKU	APR-RMR
M5_100	A:A	G:G	C:C	A:A	TRCH/SRTU/5/KAUZ//ALTAR 84/AOS/3/MILAN/KAUZ/4/HUITES	APR-RMR
M5_104	A:A	G:G	C:C	A:A	WAXWING*2/6/PVN//CAR422/ANA/5/BOW/CROW//BUC/PVN/3/YR/4/TRAP#1	APR-RMR
M5_105	A:A	G:G	C:C	A:A	WAXWING/PARUS//WAXWING/KIRITATI	APR-RMR
M5_127	A:A	G:G	C:C	A:A	PBW343*2/KUKUNA*2//KITE	APR-RMR
M5_128	A:A	G:G	C:C	A:A	PBW343*2/KUKUNA*2//KITE	APR-RMR
M5_132	A:A	G:G	C:C	A:A	PBW343*2/KUKUNA*2//YANAC	APR-RMR
M5_133	A:A	G:G	C:C	A:A	PBW343*2/KUKUNA*2//YANAC	APR-RMR
M5_134	A:A	G:G	C:C	A:A	PBW343*2/KUKUNA*2//YANAC	APR-RMR
M5_135	A:A	G:G	C:C	A:A	PBW343*2/KUKUNA*2//YANAC	APR-RMR
M5_136	A:A	G:G	C:C	A:A	PBW343*2/KUKUNA*2//YANAC	APR-RMR
M5_139	A:A	G:G	C:C	A:A	PBW343*2/KUKUNA*2//YANAC	APR-RMR
M5_140	A:A	G:G	C:C	A:A	PBW343*2/KUKUNA*2//YANAC	APR-RMR
M5_141	A:A	G:G	C:C	A:A	PBW343*2/KUKUNA*2//YANAC	APR-RMR
M5_144	A:A	G:G	C:C	A:A	PBW343*2/KUKUNA//SRTU/3/PBW343*2/KHVAKI	APR-RMR
M5_145	A:A	G:G	C:C	A:A	PBW343*2/KUKUNA//SRTU/3/PBW343*2/KHVAKI	APR-RMR
M5_146	A:A	G:G	C:C	A:A	PBW343*2/KUKUNA//SRTU/3/PBW343*2/KHVAKI	APR-RMR
M5_150	A:A	G:G	C:C	A:A	PBW343*2/KHVAKI//PARUS/3/PBW343/PASTOR	APR-RMR
M5_151	A:A	G:G	C:C	A:A	PBW343*2/KHVAKI//PARUS/3/PBW343/PASTOR	APR-RMR
M5_152	A:A	G:G	C:C	A:A	PBW343*2/KHVAKI//PARUS/3/PBW343/PASTOR	APR-RMR
M5_153	A:A	G:G	C:C	A:A	PBW343*2/KHVAKI//PARUS/3/PBW343/PASTOR	APR-RMR
M5_158	A:A	G:G	C:C	A:A	ATTILA*2/PBW65/6/PVN//CAR422/ANA/5/BOW/CROW//BUC/PVN/3/YR/4/TRAP#1/7/ATTILA/2*PASTOR	APR-RMR
M5_166	A:A	G:G	C:C	A:A	FRET2/KUKUNA//FRET2/3/WHEAR/4/FRET2*2/KUKUNA	APR-RMR
M5_167	A:A	G:G	C:C	A:A	FRET2/KUKUNA//FRET2/3/WHEAR/4/FRET2/TUKURU//FRET2	APR-RMR
M5_168	A:A	G:G	C:C	A:A	PBW343*2/KUKUNA//WHEAR/3/PBW343*2/KHVAKI	APR-RMR
M5_169	A:A	G:G	C:C	A:A	PBW343*2/KUKUNA//WHEAR/3/PBW343*2/KHVAKI	APR-RMR
M5_170	A:A	G:G	C:C	A:A	PBW343*2/KUKUNA*2//WHEAR	APR-RMR
M5_176	A:A	G:G	C:C	A:A	VARIS//SKAUZ/BAV92/3/FRET2/KUKUNA//FRET2	APR-RMR
M5_177	A:A	G:G	C:C	A:A	WBLL1/KUKUNA//TACUPETO F2001/3/UP2338*2/VIVITSI	APR-RMR
M5_178	A:A	G:G	C:C	A:A	WBLL1/KUKUNA//TACUPETO F2001/3/UP2338*2/VIVITSI	APR-RMR
M5_179	A:A	G:G	C:C	A:A	WBLL1/KUKUNA//TACUPETO F2001/3/UP2338*2/VIVITSI	APR-RMR
M5_180	?	G:G	C:C	A:A	WBLL1/KUKUNA//TACUPETO F2001/3/UP2338*2/VIVITSI	APR-RMR
M5_181	A:A	G:G	C:C	A:A	CAL/NH//H567.71/3/SERI/4/CAL/NH//H567.71/5/2*KAUZ/6/PASTOR/7/CROC_1/AE.SQUARROSA (205)//KAUZ/3/2*KAUZ*2/YACO//KAUZ	APR-RMR
H2_2	A:A	G:G	C:C	A:A	TARACHI F 2000	MR
H2_13	A:A	G:G	C:C	A:A	WHEAR/KUKUNA/3/C80.1/3*BATAVIA//2*WBLL1	MR
H2_14	A:A	G:G	C:C	A:A	PRL/2*PASTOR/4/CHOIX/STAR/3/HE1/3*CNO79//2*SERI	MR
H2_17	A:A	G:G	C:C	A:A	PFAU/WEAVER*2//KIRITATI	MR
H2_25	A:A	G:G	C:C	A:A	WAXWING*2/VIVITSI	MR
H2_26	A:A	G:G	C:C	A:A	WBLL1*2/KIRITATI	MR
H2_31	A:A	G:G	C:C	A:A	BRBT1*2/KIRITATI	MR
H2_33	A:A	G:G	C:C	A:A	WAXWING*2/KUKUNA	MR
H2_34	A:A	G:G	C:C	A:A	WAXWING*2/KIRITATI	MR
H2_38	A:A	G:G	C:C	A:A	SAAR/2*WAXWING	MR
H2_40	A:A	G:G	C:C	A:A	SERI.1B*2/3/KAUZ*2/BOW//KAUZ*2/5/CNO79//PF70354/MUS/3/PASTOR/4/BABAX	MR
H2_47	A:A	G:G	C:C	A:A	TILHI/4/CROC_1/AE.SQUARROSA (213)//PGO/3/CMH81.38/2*KAUZ	MR
H2_52	A:A	G:G	C:C	A:A	MINO/898.97	MR
H2_60	A:A	G:G	C:C	A:A	PBW343/HUITES/4/YAR/AE.SQUARROSA (783)//MILAN/3/BABAX	MR
H2_65	A:A	G:G	C:C	A:A	PFAU/SERI.1B//AMAD*2/3/PBW343*2/KUKUNA	MR
H2_68	A:A	G:G	C:C	A:A	MELON//FILIN/MILAN/3/FILIN	MR
H2_77	A:A	G:G	C:C	A:A	BABAX/3/OASIS/SKAUZ//4*BCN/4/PASTOR	MR
H2_78	A:A	G:G	C:C	A:A	CNDO/R143//ENTE/MEXI_2/3/AEGILOPS SQUARROSA (TAUS)/4/WEAVER/5/2*KAUZ/6/FRET2	MR
H2_80	A:A	G:G	C:C	A:A	HE1/3*CNO79//2*SERI/3/ATTILA/4/WH 542	MR
H2_81	A:A	G:G	C:C	A:A	HPO/TAN//VEE/3/2*PGO/4/MILAN/5/SSERI1	MR
H2_84	A:A	G:G	C:C	A:A	PFAU/WEAVER*2//KIRITATI	MR
H2_85	A:A	G:G	C:C	A:A	PGO//CROC_1/AE.SQUARROSA (224)/3/2*BORL95/4/CIRCUS	MR
H2_86	A:A	G:G	C:C	A:A	PGO/SERI//BAV92	MR
H2_93	A:A	G:G	C:C	A:A	DUCULA/2*PRINIA	MR
H2_41	A:A	G:G	C:C	A:A	PBW343*2/KUKUNA/3/PASTOR//CHIL/PRL/4/PBW343*2/KUKUNA	MR-MS
H2_43	A:A	G:G	C:C	A:A	PBW343*2/KUKUNA//PBW343*2/KUKUNA	MR-MS
H2_44	A:A	G:G	C:C	A:A	FISCAL//PBW343*2/TUKURU	MR-MS
H2_45	A:A	G:G	C:C	A:A	OTUS//PRL/2*PASTOR	MR-MS
H2_46	A:A	G:G	C:C	A:A	PRL/2*PASTOR//PBW343*2/KUKUNA	MR-MS
H2_49	A:A	G:G	C:C	A:A	CNDO/R143//ENTE/MEXI_2/3/AEGILOPS SQUARROSA (TAUS)/4/WEAVER/5/2*PASTOR/6/SKAUZ/PARUS//PARUS	MR-MS
H2_50	A:A	G:G	C:C	?	CROC_1/AE.SQUARROSA (205)//KAUZ/3/SASIA/4/TROST	MR-MS
H2_51	A:A	G:G	C:C	A:A	KAUZ*2/BOW//KAUZ/3/W98.6.38/5/SABUF/4/ALTAR 84/AE.SQUARROSA (224)//YACO/3/CROC_1/AE.SQUARROSA (205)//F27202	MR-MS
H2_55	A:A	G:G	C:C	A:A	PASTOR/KAUZ/6/CNDO/R143//ENTE/MEXI_2/3/AEGILOPS SQUARROSA (TAUS)/4/WEAVER/5/2*KAUZ	MR-MS
H2_56	A:A	G:G	C:C	A:A	PASTOR/3/VORONA/CNO79//KAUZ/4/MILAN/OTUS//ATTILA/3*BCN	MR-MS
H2_57	A:A	G:G	C:C	A:A	CHIBIA/WEAVER/5/KAUZ//ALTAR 84/AOS/3/MILAN/KAUZ/4/HUITES	MR-MS
H2_58	A:A	G:G	C:C	A:A	PRINIA/PASTOR//HUITES/3/MILAN/OTUS//ATTILA/3*BCN	MR-MS
H2_59	A:A	G:G	C:C	A:A	PBW343/HUITES/3/MILAN/OTUS//ATTILA/3*BCN	MR-MS
H2_62	A:A	G:G	C:C	A:A	PASTOR//TRAP#1/BOW/3/CHEN/AEGILOPS SQUARROSA (TAUS)//BCN/4/INQALAB 91*2/TUKURU/5/OTUS/TOBA97	MR-MS
H2_1	A:A	G:G	C:C	A:A	KAMB1*2/KUKUNA	MS
H2_3	A:A	G:G	C:C	A:A	ATTILA*2/PBW65	MS
H2_10	A:A	G:G	C:C	A:A	SERI.1B*2/3/KAUZ*2/BOW//KAUZ/5/CNO79//PF70354/MUS/3/PASTOR/4/BABAX	MS
H2_20	A:A	G:G	C:C	A:A	PFAU/SERI.1B//AMAD/3/WAXWING	MS
H2_21	A:A	G:G	C:C	A:A	WAXWING*2/TUKURU	MS
H2_22	A:A	G:G	C:C	A:A	WBLL1*2/BRAMBLING	MS
H2_27	A:A	G:G	C:C	A:A	BL2064//SW89-5124*2/FASAN/3/TILHI	MS
H2_29	A:A	G:G	C:C	A:A	CROC_1/AE.SQUARROSA (205)//BORL95/3/PRL/SARA//TSI/VEE#5/4/FRET2	MS
H2_36	A:A	G:G	C:C	A:A	WAXWING*2/VARIS	MS
H2_37	A:A	G:G	C:C	A:A	WAXWING*2/CIRCUS	MS
H2_39	A:A	G:G	C:C	A:A	SAAR*2//PBW343*2/KUKUNA	MS
H2_48	A:A	G:G	C:C	A:A	BERKUT//PBW343*2/KUKUNA	MS
H2_54	A:A	G:G	C:C	A:A	KAMB1*2/BRAMBLING	MS
H2_61	A:A	G:G	C:C	A:A	PRL/2*PASTOR/5/HUITES/4/CS/TH.SC//3*PVN/3/MIRLO/BUC/6/KIRITATI	MS
H2_66	A:A	G:G	C:C	A:A	PRL/2*PASTOR//PBW343*2/KUKUNA/3/KAMB1*2/KUKUNA	MS
H2_74	A:A	G:G	C:C	A:A	SOROCA	MS
H2_89	A:A	G:G	C:C	A:A	PBW343	MS
M5_184	A:A	G:G	C:C	A:A	PBW343	MS-S
H2_87	A:A	G:G	C:C	A:A	Kingbird=TAM200/TUI/6/PVN//CAR422/ANA/5/BOW/CROW//BUC/PVN/3/YR/4/TRAP#1	R
H2_5	A:A	G:G	C:C	A:A	KIRITATI//2*PBW65/2*SERI.1B	R-MR
H2_6	A:A	G:G	C:C	A:A	KIRITATI/4/2*SERI.1B*2/3/KAUZ*2/BOW//KAUZ	R-MR
H2_8	A:A	G:G	C:C	A:A	SERI.1B*2/3/KAUZ*2/BOW//KAUZ/4/PBW343*2/KUKUNA	R-MR
H2_16	A:A	G:G	C:C	A:A	PFAU/MILAN/4/VEE/TRAP#1//ANGRA/3/PASTOR	R-MR
H2_24	A:A	G:G	C:C	A:A	WAXWING*2/4/SNI/TRAP#1/3/KAUZ*2/TRAP//KAUZ	R-MR
H2_35	A:A	G:G	C:C	A:A	SERI/RAYON*2//PFAU/WEAVER	R-MR
H2_53	A:A	G:G	C:C	A:A	KIRITATI//SERI/RAYON	R-MR
H2_63	A:A	G:G	C:C	A:A	SW89.5277/BORL95//SKAUZ/3/PRL/2*PASTOR/4/HEILO	R-MR
H2_79	A:A	G:G	C:C	A:A	PAVON F 76	R-MR
H2_82	A:A	G:G	C:C	A:A	JUCHI F2000	R-MR
H2_83	A:A	G:G	C:C	A:A	KIRITATI	R-MR
H2_90	A:A	G:G	C:C	A:A	KENYA 131/KENYA 184 P	R-MR
H2_91	A:A	G:G	C:C	A:A	KENYA NYANGUMI	R-MR
H2_92	A:A	G:G	C:C	A:A	KENYA SWARA	R-MR
H2_9	A:A	G:G	C:C	A:A	SERI.1B*2/3/KAUZ*2/BOW//KAUZ/4/FRTL/CMH83.2517	S
H2_18	A:A	G:G	C:C	A:A	WAXWING/4/SNI/TRAP#1/3/KAUZ*2/TRAP//KAUZ	S
H2_19	A:A	G:G	C:C	A:A	KAUZ//ALTAR 84/AOS/3/MILAN/KAUZ/4/HUITES	S
H2_32	A:A	G:G	C:C	A:A	BABAX/LR42//BABAX*2/3/PAVON 7S3, +LR47	S
H2_64	A:A	G:G	C:C	A:A	SHA7//PRL/VEE#6/3/FASAN/4/HAAS8446/2*FASAN/5/CBRD/KAUZ/6/MILAN/AMSEL/7/FRET2*2/KUKUNA	S
H2_75	A:A	G:G	C:C	C:C	VOROBEY	S
M5_91	A:A	G:G	C:C	A:A	FRET2/KUKUNA//FRET2/3/TAM200/TUI/5/FRET2*2/4/SNI/TRAP#1/3/KAUZ*2/TRAP//KAUZ	Sr1A.1R? APR-RMR
M5_63	A:A	G:G	C:C	A:A	ROLF07/YANAC//TACUPETO F2001/BRAMBLING	Sr26
M5_89	A:A	G:G	C:C	A:A	FRET2/KUKUNA//FRET2/3/YANAC/4/FRET2/KIRITATI	Sr26
M5_103	A:A	G:G	C:C	A:A	PRL/2*PASTOR*2//YANAC	Sr26
M5_129	A:A	G:G	C:C	A:A	PBW343*2/KUKUNA*2//KITE	Sr26
M5_155	A:A	G:G	C:C	A:A	INQALAB 91*2/KUKUNA//SNLG/3/PBW343*2/KHVAKI	Sr26
M5_156	A:A	G:G	C:C	A:A	INQALAB 91*2/KUKUNA//SNLG/3/PBW343*2/KHVAKI	Sr26
M5_157	A:A	G:G	C:C	A:A	INQALAB 91*2/KUKUNA//YANAC/3/INQALAB 91*2/KUKUNA	Sr26
M5_160	A:A	G:G	C:C	A:A	ATTILA*2/PBW65*2//SNLG	Sr26
M5_161	A:A	G:G	C:C	A:A	ATTILA*2/PBW65*2//YANAC	Sr26
M5_42	A:A	G:G	C:C	A:A	ROLF07/YANAC	Sr26?
M5_159	A:A	G:G	C:C	A:A	ATTILA*2/PBW65/6/PVN//CAR422/ANA/5/BOW/CROW//BUC/PVN/3/YR/4/TRAP#1/7/ATTILA/2*PASTOR	Sr26?
H2_15	A:A	G:G	C:C	A:A	ELVIRA/5/CNDO/R143//ENTE/MEXI75/3/AE.SQ/4/2*OCI/6/VEE/PJN//KAUZ/3/PASTOR	Sr33?
H2_67	A:A	G:G	C:C	A:A	HUW234+LR34/PRINIA//PBW343*2/KUKUNA/3/KAMB1*2/KUKUNA	SrHUW234
M5_20	A:A	G:G	C:C	A:A	HUW234+LR34/PRINIA//KIRITATI	SrHuw234
M5_55	A:A	G:G	C:C	A:A	HUW234+LR34/PRINIA//UP2338*2/VIVITSI	SrHuw234
M5_56	A:A	G:G	C:C	A:A	HUW234+LR34/PRINIA//UP2338*2/VIVITSI	SrHuw234
M5_109	A:A	G:G	C:C	A:A	HUW234+LR34/PRINIA*2//PVN	SrHuw234
M5_110	A:A	G:G	C:C	A:A	HUW234+LR34/PRINIA*2//PVN	SrHuw234
M5_111	A:A	G:G	C:C	A:A	HUW234+LR34/PRINIA*2//SNLG	SrHuw234
M5_112	A:A	G:G	C:C	A:A	HUW234+LR34/PRINIA*2//SNLG	SrHuw234
M5_116	A:A	G:G	C:C	A:A	HUW234+LR34/PRINIA*2//YANAC	SrHuw234
M5_117	A:A	G:G	C:C	A:A	HUW234+LR34/PRINIA*2//YANAC	SrHuw234
M5_118	A:A	G:G	C:C	A:A	HUW234+LR34/PRINIA*2//YANAC	SrHuw234
M5_119	A:A	G:G	C:C	A:A	HUW234+LR34/PRINIA*2//WHEAR	SrHuw234
M5_120	A:A	G:G	C:C	A:A	HUW234+LR34/PRINIA*2//WHEAR	SrHuw234
M5_121	A:A	G:G	C:C	A:A	HUW234+LR34/PRINIA*2//WHEAR	SrHuw234
M5_122	A:A	G:G	C:C	A:A	HUW234+LR34/PRINIA*2//WHEAR	SrHuw234
M5_123	A:A	G:G	C:C	A:A	HUW234+LR34/PRINIA*2//KIRITATI	SrHuw234
M5_124	A:A	G:G	C:C	A:A	HUW234+LR34/PRINIA*2//KIRITATI	SrHuw234
M5_125	A:A	G:G	C:C	A:A	HUW234+LR34/PRINIA*2//KIRITATI	SrHuw234
H2_7	A:A	G:G	C:C	A:A	HUW234+LR34/PRINIA//PFAU/WEAVER	Sr-HUW234
M5_108	A:A	G:G	C:C	A:A	HUW234+LR34/PRINIA*2//KITE	SrHuw234/Sr26
M5_113	A:A	G:G	C:C	A:A	HUW234+LR34/PRINIA*2//SNLG	SrHuw234/Sr26
M5_114	A:A	G:G	C:C	A:A	HUW234+LR34/PRINIA*2//SNLG	SrHuw234/Sr26
M5_115	A:A	G:G	C:C	A:A	HUW234+LR34/PRINIA*2//SNLG	SrHuw234/Sr26
H2_4	A:A	G:G	C:C	A:A	ND643/2*WBLL1	Sr-ND643
H2_71	A:A	G:G	C:C	A:A	MILAN/SHA7/3/THB/CEP7780//SHA4/LIRA/4/SHA4/CHIL	SrSha7
H2_72	A:A	G:G	C:C	A:A	NING MAI 9558//CHIL/CHUM18	SrSha7
H2_94	A:A	G:G	C:C	A:A	NING9415/3/URES/BOW//OPATA/4/NINGMAI 7	SrSha7
M5_8	A:A	G:G	C:C	A:A	YUNMAI 48/4/2*SERI.1B*2/3/KAUZ*2/BOW//KAUZ	SrSha7
M5_27	A:A	G:G	C:C	A:A	ATTILA/3*BCN//BAV92/3/TILHI/4/SHA7/VEE#5//ARIV92	SrSha7
M5_28	A:A	G:G	C:C	A:A	SHA7/VEE#5/5/VEE#8//JUP/BJY/3/F3.71/TRM/4/2*WEAVER/6/PBW343*2/TUKURU	SrSha7
M5_29	A:A	G:G	C:C	A:A	SHA7/VEE#5//ARIV92/3/PBW343*2/KUKUNA	SrSha7
M5_183	A:A	G:G	C:C	A:A	NG8319//SHA4/LIRA/4/PRL/SARA//TSI/VEE#5/3/HUITES/5/MESIA	SrSha7
H2_88	A:A	G:G	C:C	A:A	CHEN/AEGILOPS SQUARROSA (TAUS)//BCN/3/CMH81.38/2*KAUZ	SrSynthetic
H2_23	A:A	G:G	C:C	A:A	BABAX/LR42//BABAX*2/3/VIVITSI	SrTmp
M5_1	A:A	G:G	C:C	A:A	QUAIU	SrTmp
M5_101	A:A	G:G	C:C	A:A	TRCH*2/7/TNMU/6/CEP80111/CEP81165/5/IAC5/4/YKT406/3/AG/ASN//ATR	SrTnmu
M5_174	A:A	G:G	C:C	A:A	ATTILA*2/PBW65//TNMU	SrTnmu
M5_175	A:A	G:G	C:C	A:A	ATTILA*2/PBW65//TNMU	SrTnmu
